# Supplementary material for: Zinc Translocation from Zn-Sufficient to Zn-Deficient Roots as an Adaptation to Heterogeneous Zn Availability
Source: Research Square preprint supplement (doi:10.21203/rs.3.rs-6802346/v1), 2025-06-13
Supplement: Supplementary file 1 [file 50b0995971d67f6850ddc3e9.pdf]

SUPPLEMENTARY DATA

## Zinc Translocation from Zn-Sufficient to Zn-Deficient Roots as an Adaptation to Heterogeneous Zn Availability

Magdalena Pypka<sup>1</sup>, Diana Davydenko<sup>1</sup>, Katarzyna Sowa<sup>2</sup>, Julia Maksymiuk<sup>1</sup>, Paweł Wróbel<sup>2,4</sup>, Tomasz Kołodziej<sup>2</sup>, Paweł Korecki<sup>3</sup> and Oskar Siemianowski<sup>1\*</sup>

<sup>1</sup>University of Warsaw, Faculty of Biology, Institute of Experimental Plant Biology and Biotechnology, Department of Plant Metal Homeostasis, Miecznikowa Street 1, 02-096, Warsaw, Poland

<sup>2</sup>National Synchrotron Radiation Centre SOLARIS, Jagiellonian University, Czerwone Maki 98; 30-392 Krakow, Poland

<sup>3</sup>Institute of Physics, Jagiellonian University, Łojasiewicza 11, 30-348 Krakow, Poland

<sup>4</sup>AGH University of Krakow, Faculty of Physics and Applied Computer Science, al. Mickiewicza 30, 30-059 Krakow, Poland

\*corresponding author: o.siemianowski@uw.edu.pl

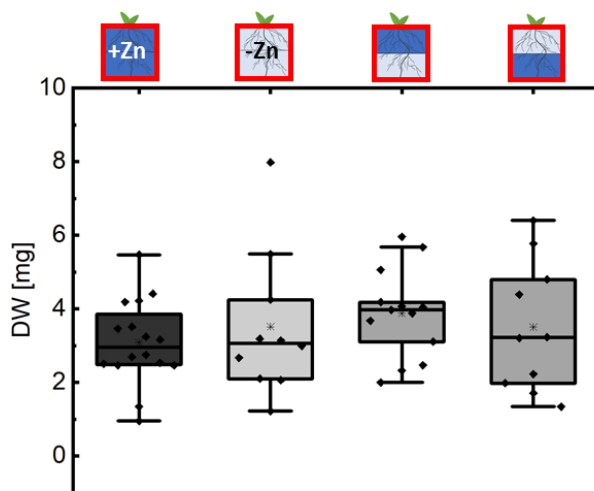

**SI Fig 1.** Root dry weight from plants grown in medium with homogeneous (1/1  $\mu\text{M}$  Zn; 0/0  $\mu\text{M}$  Zn) or heterogeneous (0/1  $\mu\text{M}$  Zn; 1/0  $\mu\text{M}$  Zn) Zn distribution (sum of upper and lower part). Pictograms above the graph indicate the region of the medium where samples were taken (red rectangles) and the corresponding treatment applied. Dark blue represents Zn-sufficient zones, light blue indicates Zn-deficient zones. and half/half

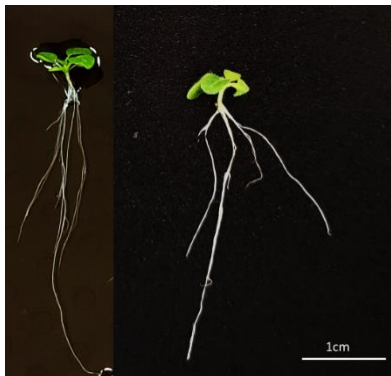

**SI Fig 2.** 2-week old plant, before transfer to transparent soil.

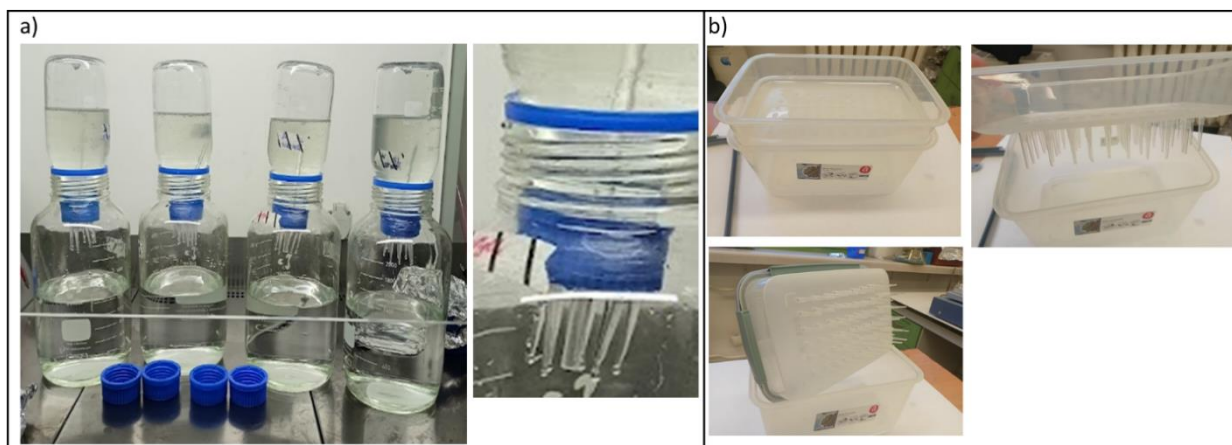

**SI Fig 2.** Sterile high-throughput production of transparent soil: a) using sterile 400ml GL40 bottle with transparent soil polymer mix, in 2L GL80 bottle with 1,2 L crosslinking solution. Screwcap was drilled and up to eight 200µL cut tips with was inserted. The Pauster glass pipet was added for facilitated air intake. b) commercial (Auchan) polypropylene (heat resistant) set made of flat and tall box that fit into each other. Flat box is drilled (up to 60 holes) and 200 µL cut tips are inserted. The choice of system depends on size of autoclave in which system need to be sterilized.

#### SI Table 1

Primers:

***NtZIP4B*** - XM\_016586154.1

ZIP4B-Forward: TCTGTTTCCAATATTACCTGC

ZIP4B-Revers: TTCTTGCCAACTAACGGG

***NtHMA4*** – both *HMAa* (HF937053.1) and *HMAb* (HF675180.1)

NtHMA4-Forward: TCTGTTTCCAATATTACCTGC

NtHMA4 -Revers: TTCTTGCCAACTAACGGG

***NtNAS*** - both tobacco NAS: NAS1 (XM\_016633252.1); NAS2 (NM\_001326005.1)

NtNAS-Forward: ATCTCGTCTCGTGGCATC

NtNAS-Reverse: TCCTTATCCATACCAACCAACG
